## EDITORIAL VIEWS

Anesthesiology  
80:1, 1994  
© 1994 American Society of Anesthesiologists, Inc.  
J. B. Lippincott Company, Philadelphia

### *More Journal Changes*

Over the past few years, a number of changes, all intended to enhance reader interest and improve Journal readability, have been introduced. The first of these changes was to separate papers reporting the results of original scientific research into Clinical and Laboratory Investigation sections of the Journal.<sup>1</sup> Second, the Journal cover was reformatted to enable readers to quickly survey the month's Journal contents.<sup>2</sup> Third, a precis was added to the listing of each scientific investigation in the table of contents, again to attract readers to papers in which they might have special interest. Fourth, each month, several papers received editorial comment in the form of a Highlight. Although less comprehensive and briefer than traditional editorials, Highlights are intended to present papers of special interest or special promise and, in addition, are used to briefly explain complex methods or concepts deemed important by the Editorial Board.

This issue of the Journal continues the evolution started several years ago with the introduction of a new section, "This Month in ANESTHESIOLOGY." Differentiated from Editorials and Highlights, this section, prepared by a lay writer, summarizes in a paragraph or two a number of articles identified by the Editors as

being of particular interest for any of a variety of reasons and, it is hoped, will attract readers to papers they might otherwise not read. Also in this issue of the Journal, the Guide for Authors is expanded to include a section titled "Contemporary Issues Forum." Our intent is to encourage submission of papers covering a broad range of subjects of contemporary interest (*i.e.*, health care policy, medicolegal issues, and other relevant issues of social, political, and cultural concern) beyond those usually published as a Special Article (*e.g.*, history, surveys). To some extent, papers dealing with topics similar to those published as "Sounding Board" articles in other journals are being solicited. We hope that our continued efforts at broadening the scope of what is published in the Journal in an attempt to appeal to a greater number of anesthesiologists as well as non-anesthesiologists will be well received, and I would appreciate comments as to whether we have succeeded in our objectives.

**Lawrence J. Saidman, M.D.**  
Editor in Chief

### References

1. Saidman LJ: A change in format for ANESTHESIOLOGY. ANESTHESIOLOGY 70:1-2, 1989
2. Saidman LJ: Some changes in the journal. ANESTHESIOLOGY 78:1, 1993

Accepted for publication November 15, 1993.

Key words: Journal, changes: Guide for Authors; This Month in ANESTHESIOLOGY.
